# Supplementary material
Source: publisher figshare collection journal article supplement (https://tandf.figshare.com/ndownloader/files/34127401)
Supplement: Supplementary file 1 [file 34127401]

# Appendix 1 – Focus Group Handbook

Attached here is only the sections of the handbook which are relevant to this research question (i.e. part 3 of 3 as described on page 6 under context of study). If you would like a copy of the full handbook, please do not hesitate to contact me at [una.beagon@tudublin.ie](mailto:una.beagon@tudublin.ie).

Contents

[1. Purpose of document 1](#_Toc688985)

[2. Timescale 1](#_Toc688986)

[3. Ethical Approval 1](#_Toc688987)

[4. Focus Group Questions 1](#_Toc688988)

[5. Overall outline of focus group activity 2](#_Toc688989)

[6. Proposed report outline 4](#_Toc688991)

[Appendix A – Ethical approval documentation 5](#_Toc688992)

1. Purpose of document

The purpose of this document is to set out in detail the plan for the focus groups as part of Activity 1: Task 2 of the A-STEP 2030 project. It is important that the same procedure is followed in each country to enable a direct comparison to be made between focus group outputs.

Three focus groups will be carried out in France, Ireland, Finland and Denmark. The order in which the groups are carried out is not relevant, but will include engineering students, engineering academics and professional engineers. It is proposed that each focus group will have 8-12 participants and will last no longer than 130 minutes.

At least two people will be required to run the focus group; a Facilitator and an Observer.

Equipment needed will include; whiteboards, markers, post-it notes, a voice recorder. Each participant will also require; an individual consent form, a copy of Questionnaire 1 (Printed at A4), a copy of Questionnaire 2 (printed at A3), a copy of Appendix D - Descriptions of SDGs.

1. Timescale

Subject to ethical approval, the focus groups will be held between the end of March and the end of May 2019, with findings in the form of a report to be issued to the Task 2 leader [TUDublin] by 15th July 2019 as indicated in Table 1.

Table 1: Timeline for Focus Group activity extracted from Activity 1 timeline document and deadline for focus groups extended to end of May.

| **Task** | **Duration** | **Start** | **Finish** |
| --- | --- | --- | --- |
| **Organise Focus Groups (3 per country)** | 6 wks | Tue 26/03/19 | Mon 06/05/19 |
| **Focus Groups complete (Milestone)** | 1 day | Fri 31/05/19 | Fri 31/05/19 |
| **Transcribe, Analyse and write up findings** | 6 wks | Mon 03/06/19 | Fri 12/07/19 |
| **Issue initial findings to TU Dublin** | 1 day | Mon 15/07/19 | Mon 15/07/19 |

1. Ethical Approval

Ethical approval will be submitted by TU Dublin on behalf of the A-STEP 2030 team. The ethical approval documents are included in Appendix A.

These documents include instructions on how invites are to be sent out to participants, how consent is obtained, and how the data and analysis will be stored to ensure anonymity and security of information.

Once ethical approval has been granted, all parties must adhere to the approved details.

Each academic partner should then seek ethical approval through their own institution.

1. Focus Group Questions

[PLEASE BE AWARE THAT ONLY SOME RESULTS FROM SESSION 3 ARE INCLUDED IN THIS PAPER]

The focus groups seek to provide insights into the following questions, which have been derived from the literature review process and to allow comparison and contrast between different groups and countries involved in the study.

Session 1

1. To what extent are professionals/academics/students aware of Sustainable Development (SD)?
2. To what extent are professionals/academics/students aware of the Sustainable Development Goals?
3. To what extent do you think diversity is important in achieving the SDGs?

Session 2

1. Do professionals/academics/students currently engage in sustainable development related activities?

Session 3

1. What are the competences that engineers will need to attain sustainable development?
2. Why do you think these competences are important?

7(a). For professionals and academics: Do engineers today possess these competences?

7(b). For students: Do engineering students develop these competences in their engineering programmes?

1. Overall outline of focus group activity

It is proposed that the focus group is split into three parts in order to generate activity and discussion.

Each session will look at a different aspect of the questions. The first, extent of knowledge, the second current activities and the third, competence requirements. Table 2 outlines the overall plan for the activity along with timing and activity types.

[PLEASE BE AWARE THAT ONLY SOME RESULTS FROM SESSION 3 ARE INCLUDED IN THIS PAPER]

Table 2: Outline of focus group

| **Timing** | **Task** | **Activity Type** |
| --- | --- | --- |
| **0-5 minutes** | Introduction (5 mins) | Facilitator welcomes participants and explains how the activity will proceed.  Observer to circulate and collect consent forms and attendance sheet along with section asking for contact details so that we may send them the final report. |
| **5- 10 minutes** | Participant introduction (5 mins) | Facilitator asks each participant to briefly introduce themselves. |
| **10-15 minutes** | Awareness of SD Questionnaire 1.  (5 mins) | Facilitator asks each person to complete Questionnaire No 1 included in Appendix B. |
| **15-25 minutes** | Awareness of SDGs  (10 mins) | Participants are then asked to write their answers to Q1.1c (themes) on post it notes and stick them to a whiteboard.  (Observer collects Questionnaire 1 before anyone “adds” additional answers from the group conversation)  Facilitator collates answers to Q1.1d – Names of SDGs and facilitator writes these on a whiteboard.  Whilst they are doing this, observer collates all the post its into groups to give an idea of how people in the room define Sustainable Development (like a spider diagram) |
| **25-30 mins** | Feedback (5 mins) | Facilitator now summarises the thoughts of those in the room using the whiteboard and spider diagram. |
| **30-35 mins** | Video (5 mins) | Facilitator introduces video in SDGs and shows it to the audience. <https://sustainabledevelopment.un.org/sdgs> |
| **End of Session 1: At this point, we should have some data on the awareness of SD (extent of words used to describe SD) and data on awareness of SDGs. We finish this session by telling them about the SDGs. (I’ve created some sketches to show what this might look like).** | | |
| **35 – 50 mins** | Questionnaire 2  (15 mins) | Facilitator asks participants to complete a questionnaire individually, with slightly different questionnaires for each group (professionals, academics, students). Questionnaires are included in Appendix C.  (Participants are provided with short definitions of each SDG – Appendix D.) |
| **50 – 65 mins** | Group discussion on questionnaire outputs. (15 mins) | The facilitator asks for feedback on the outcome of the questionnaire.  The observer should record this section of the session and should take notes when participants are giving their views. |
| **65 - 80 mins** | BREAK (tea/coffee)  (15 mins) | BREAK |
| **End of Session 2: At this point, we should have some data on the current engagement or exposure to sustainable related activities. We have tried to keep similar questions in each of the questionnaires, although with a focus on each group. We will have the questionnaires which can be submitted and also some insights into SDGs.** | | |
| **80 – 85 mins** | Competences list  (5 mins) | Facilitator asks each small group (max 3) to write down as many competences as possible they think engineers will need to attain sustainable development (at least 10). |
| **85-100 mins** | Group discussion  (15 mins) | Facilitator now asks each group to discuss. |
| **100-125 mins** | Group Feedback session (25 minutes) | The facilitator now facilitates a discussion on those competences on the board between the whole group.  For each competence; the group is asked;  **For Professionals and Academics:**  *Why do you think this competence is important?*  *Do you think engineers currently possess these competences?*  **For Students:**  *Why do you think this competence is important?*  *Do you think engineering students develop these competences in their engineering programmes? If so, How?*  The observer should record this section of the session and should take notes when participants are giving their views. |
| **125- 130 mins** | Wrap up and thank you (5 mins) | The facilitator summarises the findings on the board to the whole group, and thanks them for their participation. |
| **End of Session 3: Now we have data on lists of competences (that participants came up with – not a predetermined list).** | | |

1. Proposed report outline

Each partner will produce a report summarising the focus groups in each country describing the attendees, a summary of the data collected and any findings from the verbal reports.

Appendix A – Ethical approval documentation

This section includes the documents which were issued to the Research Ethics Committee in TU Dublin in February 2019 for approval.

Subject to approval by the TU Dublin ethics committee, it is intended that the same documentation is used by partners in other countries. The documents may be translated into the relevant language for each country where applicable. Confirmation of ethical approval will be forwarded when received along with any updated documents to be used.

There are two aspects to the ethics application;

1. Invitation email which will be sent to potential participants.
2. Information sheet and Consent Form

Each partner must undertake to collect, store and use data in line with the statement on the consent sheet and with the recommendations of the ethics committee. Attention is drawn to the General Data Protection Regulations (GDPR) with regard to storage of personal information (<https://eugdpr.org/>) and in particular attention is drawn to the European Code of Conduct for Research Integrity (<http://ec.europa.eu/research/participants/data/ref/h2020/other/hi/h2020-ethics_code-of-conduct_en.pdf>). Each partner must also ensure that all insurance and indemnity requirements are in place for the focus groups and that formal ethical approval is also obtained in each partner institution.

Invitational email:

(Please amend where necessary dependant on whether this is addressed to professionals, academics or students.) Please note we cannot mention sustainable development or the SDGs in the project description as one of our first questions in the focus group is to ascertain how aware they are of these terms.

Dear XXXX,

I would like to invite you to a focus group as part of an EU project in which we are a partner. The project is entitled A-STEP 2030.

There are three activities to the project. The first includes a literature review and focus groups with professionals, academics and students. The second activity looks at values and motivations of young people and adult learners and the third brings this knowledge together in order to design a learning and teaching activity to attract a diverse student group to the engineering profession.

We are particularly interested in the views of PROFESSIONALS/ACADEMICS/STUDENTS and would therefore like to invite you to a focus group which will take place:

Where: Room xxx, TU Dublin, Aungier Street Campus

When: Wednesday 3rd April 2019, 5-7pm.

I have attached an information sheet and consent form which gives more details on the project, how data will be collected and stored. I would be grateful if you could review this and let me know if you would be willing to participate.

Please note your participation is voluntary and you may withdraw at any time during the focus group session. I hope you can join us and look forward to hearing from you.

Best Regards,

Una

INFORMATION SHEET AND CONSENT FORM

| Researcher’s Name | **Prof. Brian Bowe & Una Beagon**  **CREATE Research Group, TU Dublin** | | | | | |
| --- | --- | --- | --- | --- | --- | --- |
| Academic Unit |
| Title of Study | **A-STEP-2030 “Attracting Diverse Talent to the Engineering Profession of 2030”** | | | | | |
| Dear Participant,  Many thanks for engaging in this focus group which should take approximately 2 hours.  Project Aim:  The project is entitled A-STEP 2030 - Attracting Diverse Talent to the Engineering Professions of 2030.  There are three activities to the project. The first includes a literature review and focus groups with professionals, academics and students. The second activity looks at values and motivations of young people and adult learners and the third brings this knowledge together in order to design a learning and teaching activity to attract a diverse student group to the engineering profession.  Focus Group Aim  We would like to use this focus group to gather your thoughts on the competence requirements of engineers in 2030. We will do this through a series of questionnaires, exercises and discussions.  Confidentiality:  Group discussions will be digitally recorded and transcribed. The outputs of each individual questionnaire, and all group discussions will remain anonymous. All information collected including this consent form will be treated confidentially and all personal data will be encrypted and stored on a TU Dublin password protected computer.  Withdrawal: Your participation is voluntary. You may withdraw at any time during the focus group session.  Timescale: We are obliged to retain data for the period of the study (to September 2021), during which time it will be held securely and confidentially, and after which it will be destroyed.  Researchers Involved in this Focus Group: Una Beagon, Prof Brian Bowe.  Ethical Approval: This project has been approved by the TU Dublin Research Ethics committee on XXXXX.  You are free to contact the ethics committee at researchethics@tudublin.ie should you wish to make a complaint on ethical grounds. | | | | | | |
| The following section should be completed by the research participant | | | | | | |
|  | | | | | Yes | No |
| Have you been fully informed of the nature of this study by the researcher? (Note that this would typically include use of a participant information sheet.) | | | | | 🞎 | 🞎 |
| Have you had an opportunity to ask questions about this research? | | | | | 🞎 | 🞎 |
| Have you received satisfactory answers to all of your questions? | | | | | 🞎 | 🞎 |
| Have your received sufficient information about the potential health and/or safety implications of this research? | | | | | 🞎 | 🞎 |
| Have you been full informed of your ability to withdraw participation and/or data from the research? | | | | | 🞎 | 🞎 |
| Have you been fully informed of what will happen to data generated by your participation in the study and how it will be kept safe? | | | | | 🞎 | 🞎 |
| Do you agree to take part in this study, the results of which may be disseminated in scientific publications, books or conference proceedings? | | | | | 🞎 | 🞎 |
| Have your been informed that this consent form shall be kept securely and in confidence by the researcher? | | | | | 🞎 | 🞎 |
| Name of Participant | | Please use block capitals | | | | |
| Signature of Participant | |  | Date |  | | |
| Signature of Researcher | |  | Date |  | | |

# Appendix 2

# Template for reporting on Focus Group Outcomes

Attached here are only the introductory pages and the headings of the template which are relevant to this research question (i.e. part 3 of 3 as described on page 6 under context of study). Please contact me at [una.beagon@tudublin.ie](mailto:una.beagon@tudublin.ie) if you would like more details.

| FOCUS GRoupS REPORT  IRELAND |
| --- |

Report on focus groups held in Ireland

as part of Activity 1: Task 2.

Contents

[1. Purpose of document 1](#_Toc95891618)

[2. Summary of focus groups participants 1](#_Toc95891619)

[3. Focus Group Questions 1](#_Toc95891620)

[4. Student Focus Group Results 2](#_Toc95891621)

[Questionnaire Q3 Results - Students 2](#_Toc95891622)

[Discussion – Competence Requirements – Outcomes – Students 2](#_Toc95891623)

[Key summary of findings from Student Focus Group in Ireland 2](#_Toc95891624)

[5. Academic Focus Group Results 2](#_Toc95891625)

[Questionnaire Q3 Results - Academics 2](#_Toc95891626)

[Discussion – Competence Requirements – Outcomes – Academics 2](#_Toc95891627)

[Key summary of findings from Academic Focus Group in Ireland 3](#_Toc95891628)

[6. Employer Focus Group Results 3](#_Toc95891629)

[7. Discussion – Competence Requirements – Outcomes – Employers 3](#_Toc95891630)

[Key summary of findings from Employer Focus Group in Ireland 3](#_Toc95891631)

[8. Overall comparison of Focus Groups in Ireland 3](#_Toc95891632)

1. Purpose of document

This document reports on the outcomes of the focus groups held in Ireland as part of the A-Step 2030 project. Each focus group is described in detail and a comparison between focus group outputs is also provided. Please refer to the document entitled “Focus Group Instructions” which details the exact description of how the focus groups were carried out.

1. Summary of focus groups participants

A summary of participants for the Focus Groups is shown in Table 1.

Table 1: Summary of focus group participants

| **Date** | **Group** | **General Description of participants** |
| --- | --- | --- |
| **3rd April 2019** | Engineering students from TU Dublin | 7 no in total  (4 x Civil Engineering, 1 x Mechanical Engineering, 1 x Mechanical/Manufacturing Engineering, 1 x General Engineering)  (1 x first year, 2 x 2nd year, 3 students having studied for 4 years and 1 student having studied for 5 years) |
| **20th May 2019** | Engineering Academics from TU Dublin | 9 (Civil & Structural .x3) Electrical and Electronic s 1, Mechanical x 4, building Engineering x 1) |
| **18th June 2019** | Engineering Employers Ireland | 6 no in total  (Electrical x 2, Civil x 1, Structural x 1, Telecoms /IT x 1X N/A) |

1. Focus Group Questions

The focus groups seek to provide insights into the following research questions, which have been derived from the literature review process and to allow comparison and contrast between different groups and countries involved in the study.

Session 1

- To what extent are professionals/academics/students aware of Sustainable Development (SD)?
- To what extent are professionals/academics/students aware of the SDGs?
- To what extent do you think diversity is important in achieving the SDGs?

Session 2

- Do professionals/academics/students currently engage in sustainable development related activities?

Session 3

- What are the competences that engineers will need to attain the Sustainable Development Goals (SDGs)?
- Why do you think these competences are important?
- (a). For professionals and academics: Do engineers today possess these competences?
- (b). For students: Do engineering students develop these competences in their engineering programmes?

1. Student Focus Group Results

Questionnaire Q3 Results - Students

The third part invited participants to write down as many competences as possible engineers will need to attain the SDGs. The words that participants selected are included below in Table 5.

Table 5: Competences required of Engineers to achieve the SDGs

| Group 1 | Group 2 | Group 3 |
| --- | --- | --- |
|  |  |  |
|  |  |  |
|  |  |  |

Discussion – Competence Requirements – Outcomes – Students

The focus groups were asked to discuss the outcomes of the Q3 results. The following table 7 outlines the categories, descriptions and relevant quotes which were extracted from analysis of this focus group session.

Table 7: Categories extracted from the second Focus Group Discussion regarding the competence requirements for SDGs.

| **Category Description** | **Relevant Quote** |
| --- | --- |
|  |  |

Key summary of findings from Student Focus Group in Ireland

1. Academic Focus Group Results

Questionnaire Q3 Results - Academics

The third part invited participants to write down as many competences as possible engineers will need to attain the SDGs. The words that participants selected are included below in Table 11.

Table 11: Competences required of Engineers to achieve the SDGs

| Group 1 | Group 2 | Group 3 |
| --- | --- | --- |
|  |  |  |
|  |  |  |
|  |  |  |

Discussion – Competence Requirements – Outcomes – Academics

The focus groups were asked to discuss the outcomes of the Q3 results. The following table 13 outlines the categories, descriptions and relevant quotes which were extracted from analysis of this focus group session.

Table 13: Categories extracted from the second Focus Group Discussion regarding the competence requirements for SDGs.

| **Category Description** | **Relevant Quote** |
| --- | --- |
|  |  |

Key summary of findings from Academic Focus Group in Ireland

1. Employer Focus Group Results

The third part invited participants to write down as many competences as possible engineers will need to attain the SDGs. The words that participants selected are included below in Table 15.

Table 15: Competences required of Engineers to achieve the SDGs

| Group 1 | Group 2 | Group 3 |
| --- | --- | --- |
|  |  |  |
|  |  |  |
|  |  |  |

1. Discussion – Competence Requirements – Outcomes – Employers

The focus groups were asked to discuss the outcomes of the Q3 results. The following table 16 outlines the categories, descriptions and relevant quotes which were extracted from analysis of this focus group session.

Table 16: Categories extracted from the second Focus Group Discussion regarding the competence requirements for SDGs.

| **Category Description** | **Relevant Quote** |
| --- | --- |
|  |  |

Key summary of findings from Employer Focus Group in Ireland

1. Overall comparison of Focus Groups in Ireland
